# Supplementary material
Source: publisher site journal article supplement (https://www.spandidos-publications.com/2855/downloadSupplementary)

Figure S1. miR-744-5p expression in cells transfected with miR-744-5p mimics or inhibitor. (A) The relative miR-744-5p expression levels in Shg44 cells transfected with miR-744-5p mimics were determined via RT-qPCR. (B) The relative miR-744-5p expression levels in A172 cells transfected with miR-744-5p inhibitor were determined via RT-qPCR. \*\*\* $P < 0.001$  vs. NC.miR, microRNA; NC, negative control; RT-qPCR, reverse transcription-quantitative PCR.

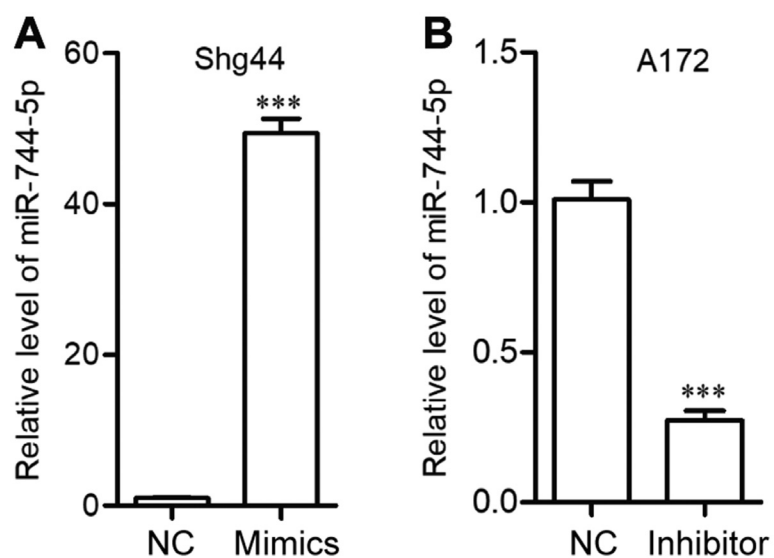

Supplement: Supplementary file 1 [file downloadSupplementary]
